## Correction: Overexpression of wildtype EGFR is tumorigenic and denotes a therapeutic target in non-small cell lung cancer

Naiqing Xu<sup>1,2,3,\*</sup>, Wenfeng Fang<sup>4,\*</sup>, Libing Mu<sup>5</sup>, Yanna Tang<sup>4</sup>, Lei Gao<sup>2</sup>, Shengxiang Ren<sup>6</sup>, Dengfeng Cao<sup>7</sup>, Lixin Zhou<sup>8</sup>, Aiqun Zhang<sup>9</sup>, Deruo Liu<sup>10</sup>, Caicun Zhou<sup>6</sup>, Kwok-Kin Wong<sup>11</sup>, Lei Yu<sup>12</sup>, Li Zhang<sup>4</sup> and Liang Chen<sup>1,2,3,13</sup>

<sup>1</sup> Graduate School of Peking Union Medical College, Beijing, China

<sup>2</sup> National Institute of Biological Sciences, Beijing, China

<sup>3</sup> Chinese Academy of Medical Sciences, Beijing, China

<sup>4</sup> Collaborative Innovation Center for Cancer Medicine, Sun Yat-Sen University Cancer Center, Guangzhou, Guangdong, P. R. China

<sup>5</sup> Tsinghua University School of Medicine, Beijing, China

<sup>6</sup> Shanghai Pulmonary Hospital, Shanghai, China

<sup>7</sup> Cancer Hospital and Institute, Chinese Academy of Medical Sciences, Beijing, China

<sup>8</sup> Peking University Cancer Hospital, Beijing, China

<sup>9</sup> General Hospital of People's Liberation Army, Beijing, China

<sup>10</sup> Department of Thoracic Surgery, China-Japan Friendship Hospital, Beijing, China

<sup>11</sup> Department of Medical Oncology, Dana-Farber Cancer Institute, Boston, MA, USA

<sup>12</sup> Beijing Tongren Hospital, Capital Medical University, Beijing, China

<sup>13</sup> National Institute of Biological Sciences, Collaborative Innovation Center for Cancer Medicine, Beijing, China

\* These authors have contributed equally to this work

**Published:** October 16, 2018

**Copyright:** Xu et al. This is an open-access article distributed under the terms of the Creative Commons Attribution License 3.0 (CC BY 3.0), which permits unrestricted use, distribution, and reproduction in any medium, provided the original author and source are credited.

**This article has been corrected:** The correct Grant Support information is given below:

### GRANT SUPPORT

This work was funded by National Natural Science Foundation of China grant 81472606, Chinese Ministry of Science and Technology grant (973 grant) 2011CB812401, and the Beijing Municipal Government.

Original article: Oncotarget. 2016; 7:3884-3896. <https://doi.org/10.18632/oncotarget.6461>
